# Supplementary material
Source: PubMed Central journal article supplement (PMC4249575)
Supplement: AAC.03860-14_zac012143468so1.pdf [file AAC.03860-14_zac012143468so1.pdf]

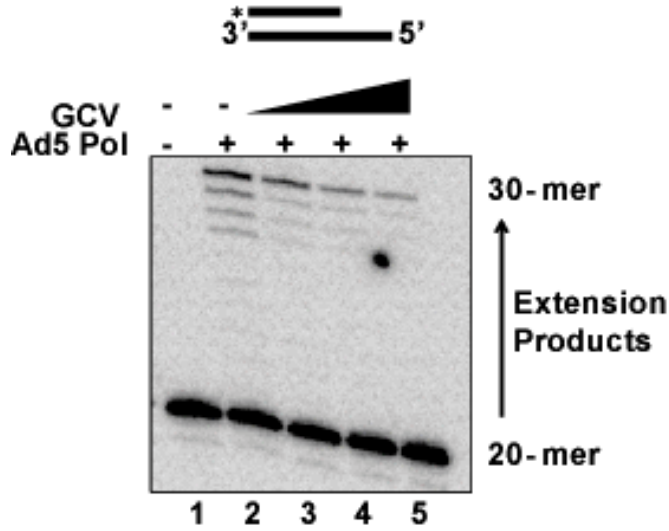

1

2 **Supplementary Figure 1. GCV reduces Ad5 DNA polymerase extension efficiency.**

3 Nucleotide extension by Ad5 DNA polymerase (12.5ng) was assayed on a substrate containing a

4 5' labeled 20-mer annealed to a 30-mer template in the absence (lane 2) or presence (lanes 3-5)

5 of increasing amounts (50, 100, 200  $\mu$ M) of GCV. The substrate is depicted above the figure,

6 with the asterisk denoting the location of the radiolabel. (+) indicates the presence and (-)

7 indicates the absence of enzyme or inhibitor. The 20-mer labeled primer, the 30-mer fully

8 extended product and the intermediate extension products are noted in the figure.

9

10
